# Supplementary material for: Boosting photo-assisted efficient electrochemical CO2 reduction reaction on transition metal single-atom catalysts supported on the C6N6 nanosheet
Source: Royal Society of Chemistry journal article supplement (doi:10.1039/d3cp00933e), 2023-01-01
Supplement: d3cp00933e1.pdf [file d3cp00933e1.pdf]

**Boosting Photo-assisted efficient Electrochemical CO<sub>2</sub> Reduction Reaction  
on Transition Metal Single-Atom Catalysts Supported on C<sub>6</sub>N<sub>6</sub> nanosheet:  
A Computational Study**

Supriti Dutta, Swapan K Pati\*

*Theoretical Sciences Unit, School of Advanced Materials, Jawaharlal Nehru Centre for Advanced  
Scientific Research (JNCASR), Bangalore 560064, India.*

\*Corresponding author. E-mail: [swapan.jnc@gmail.com](mailto:swapan.jnc@gmail.com) Phone: 080-22082839

ORCID ID: [orcid.org/0000-0002-5124-7455](https://orcid.org/0000-0002-5124-7455)

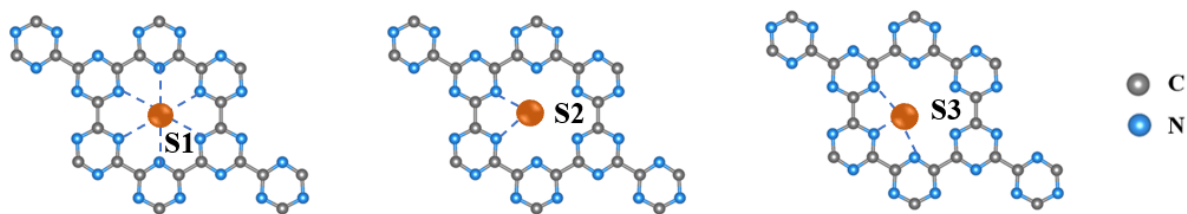

**Figure S1.** Optimized geometry of C<sub>6</sub>N<sub>6</sub> nanosheet and various possible adsorption sites (S1, S2, S3) considered on the surface for doping single TM atom (TM = Fe, Co, Ni).

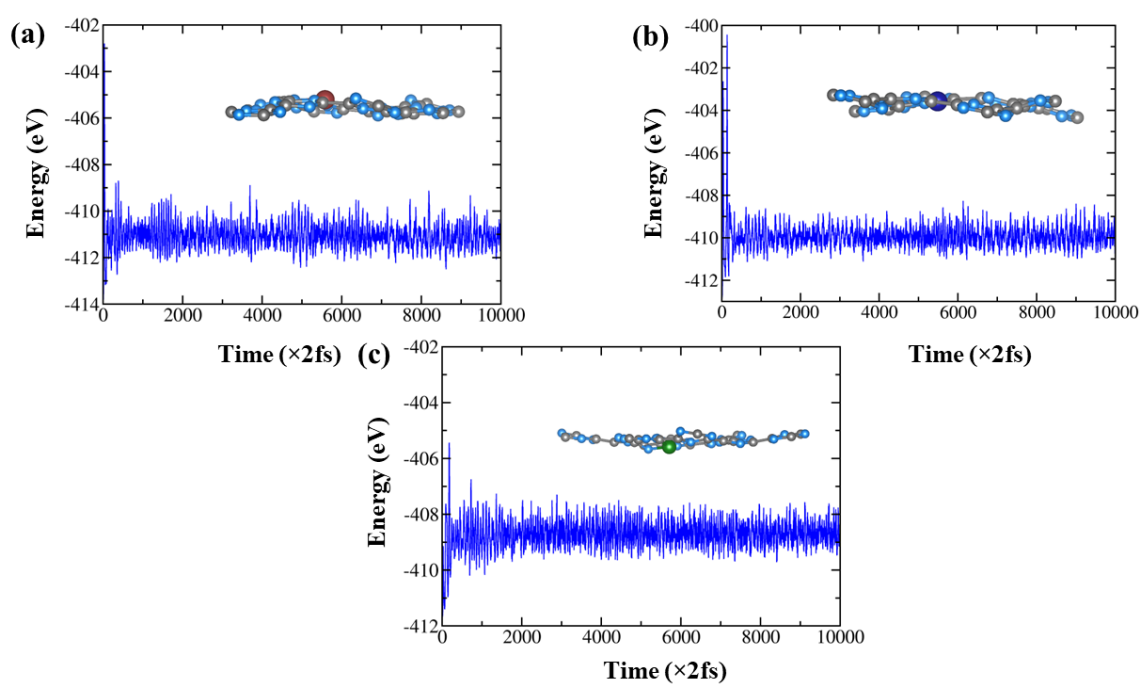

**Figure S2.** Variation of energy with time for AIMD simulation of (a) Fe@C<sub>6</sub>N<sub>6</sub>, (b) Co@C<sub>6</sub>N<sub>6</sub> and, (c) Ni@C<sub>6</sub>N<sub>6</sub> sheet at 500 K for a period of 20 ps with a time step of 2 fs.

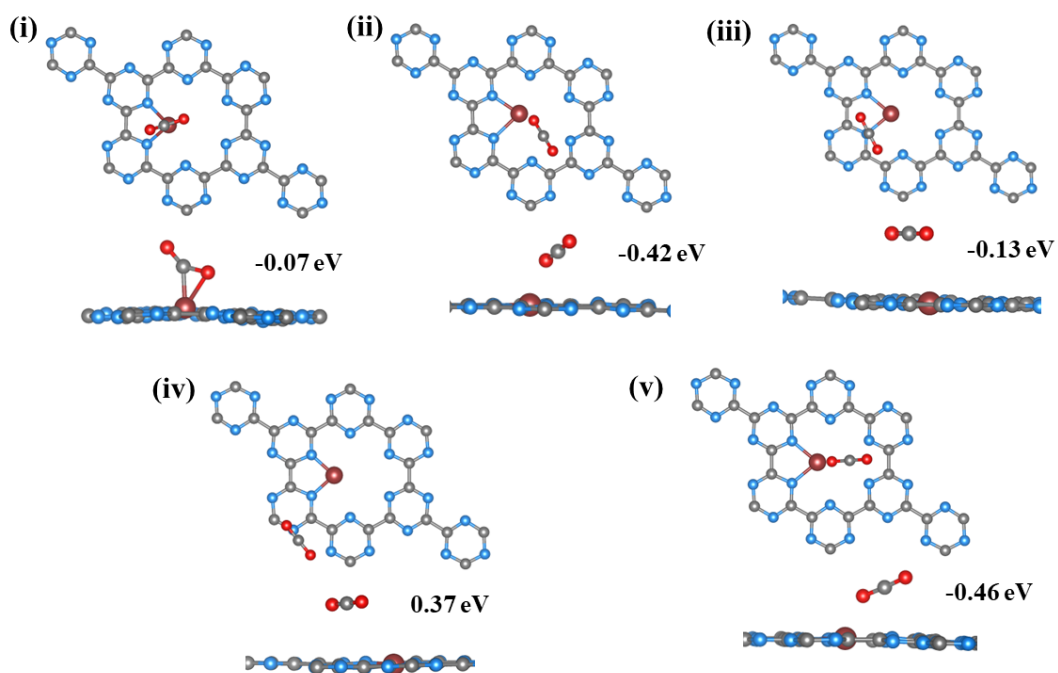

**Figure S3.** Optimized adsorption configurations for CO<sub>2</sub> adsorption and the corresponding adsorption energies (in eV) on Fe@C<sub>6</sub>N<sub>6</sub>.

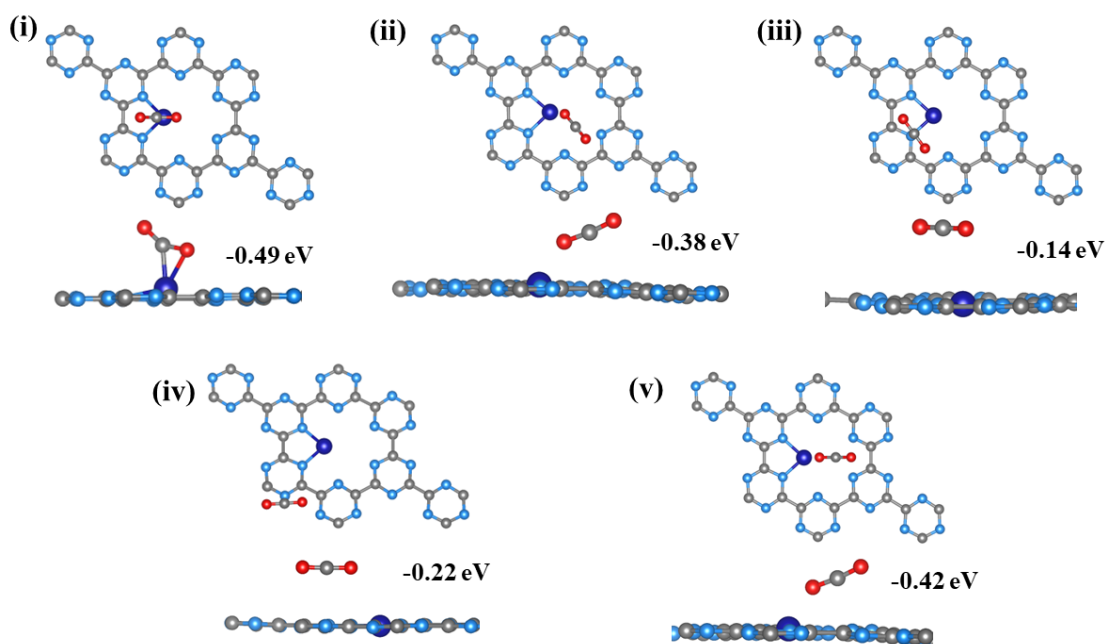

**Figure S4.** Optimized adsorption configurations for CO<sub>2</sub> adsorption and the corresponding adsorption energies (in eV) on Co@C<sub>6</sub>N<sub>6</sub>.

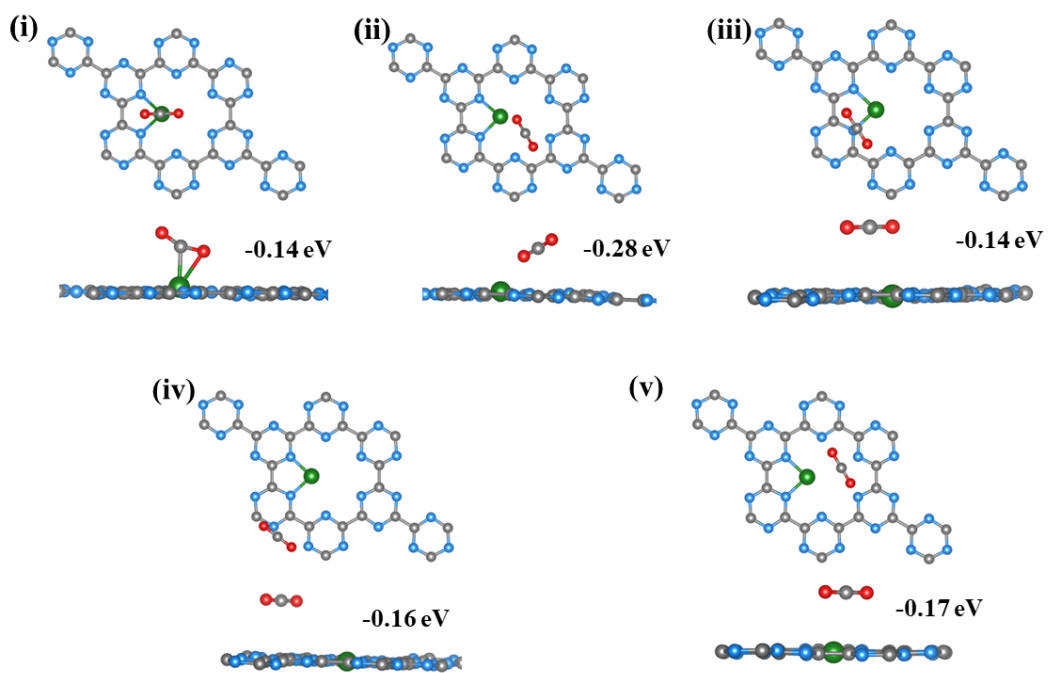

**Figure S5.** Optimized adsorption configurations for CO<sub>2</sub> adsorption and the corresponding adsorption energies (in eV) on Ni@C<sub>6</sub>N<sub>6</sub>.

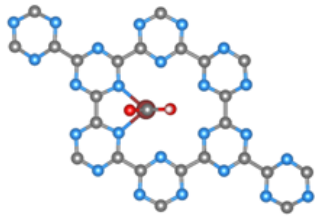

\*COOH

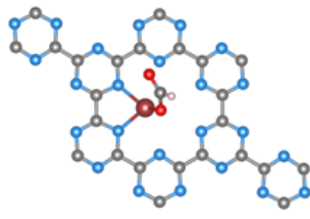

\*OCHO

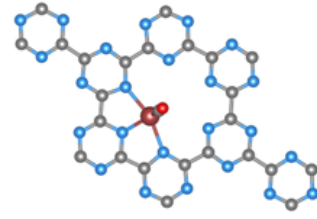

\*CO

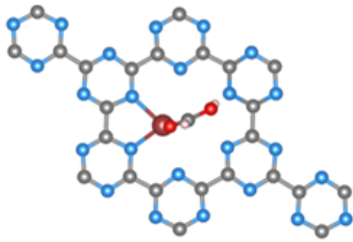

\*HCOOH

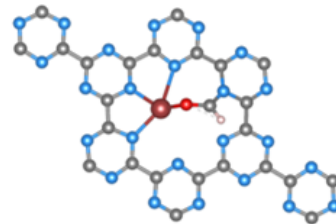

\*CHO

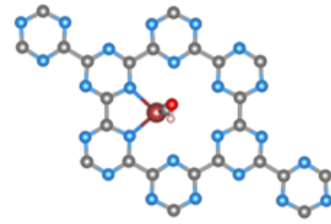

\*COH

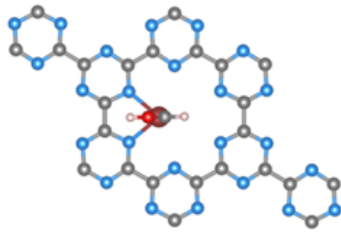

\*CHOH

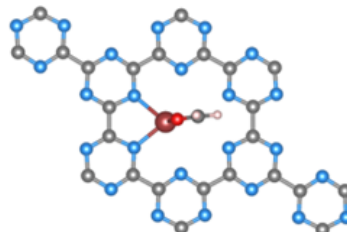

\*OCH<sub>2</sub>

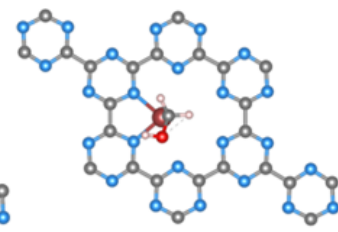

\*CH<sub>2</sub>OH

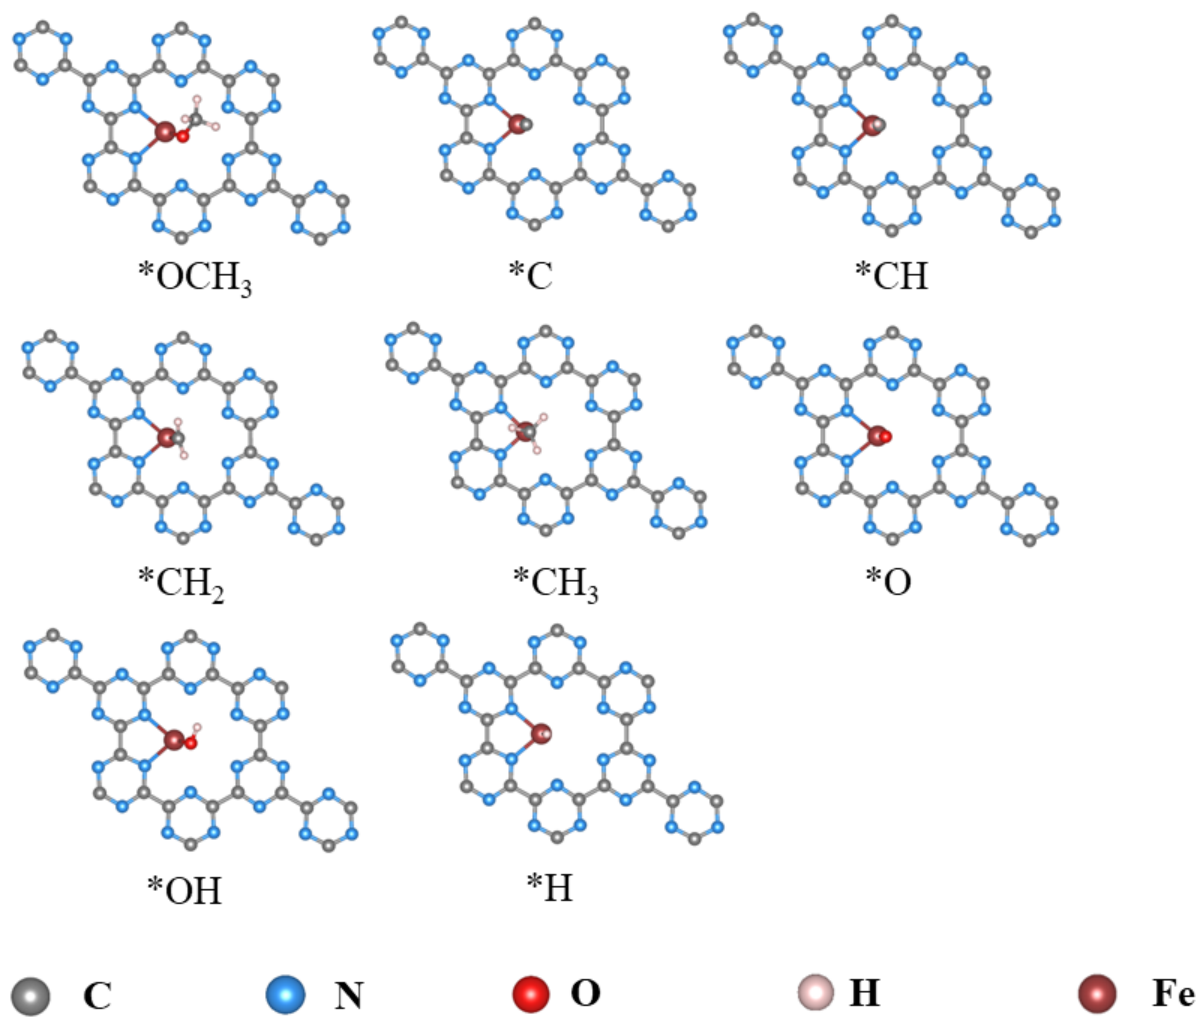

**Figure S6.** Optimized geometries for the intermediates along CO<sub>2</sub>RR pathway on Fe@C<sub>6</sub>N<sub>6</sub>

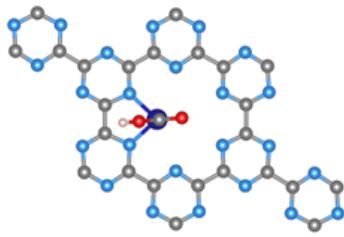

\*COOH

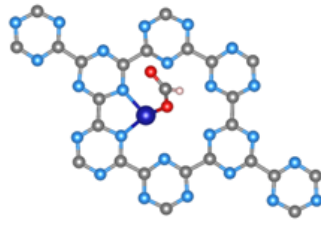

\*OCHO

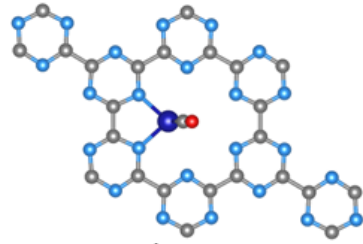

\*CO

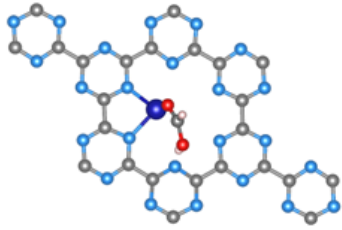

\*HCOOH

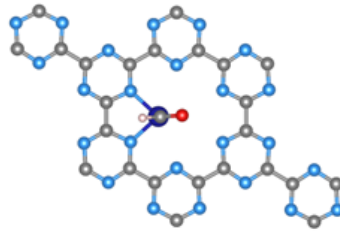

\*CHO

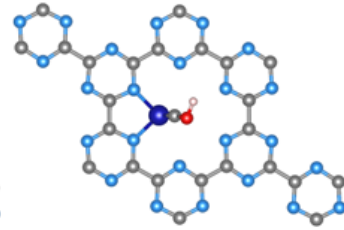

\*COH

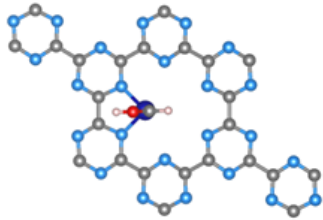

\*CHOH

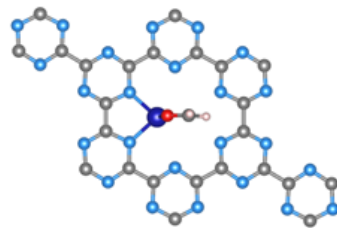

\*OCH<sub>2</sub>

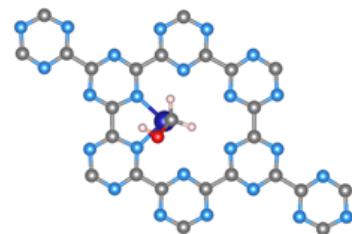

\*CH<sub>2</sub>OH

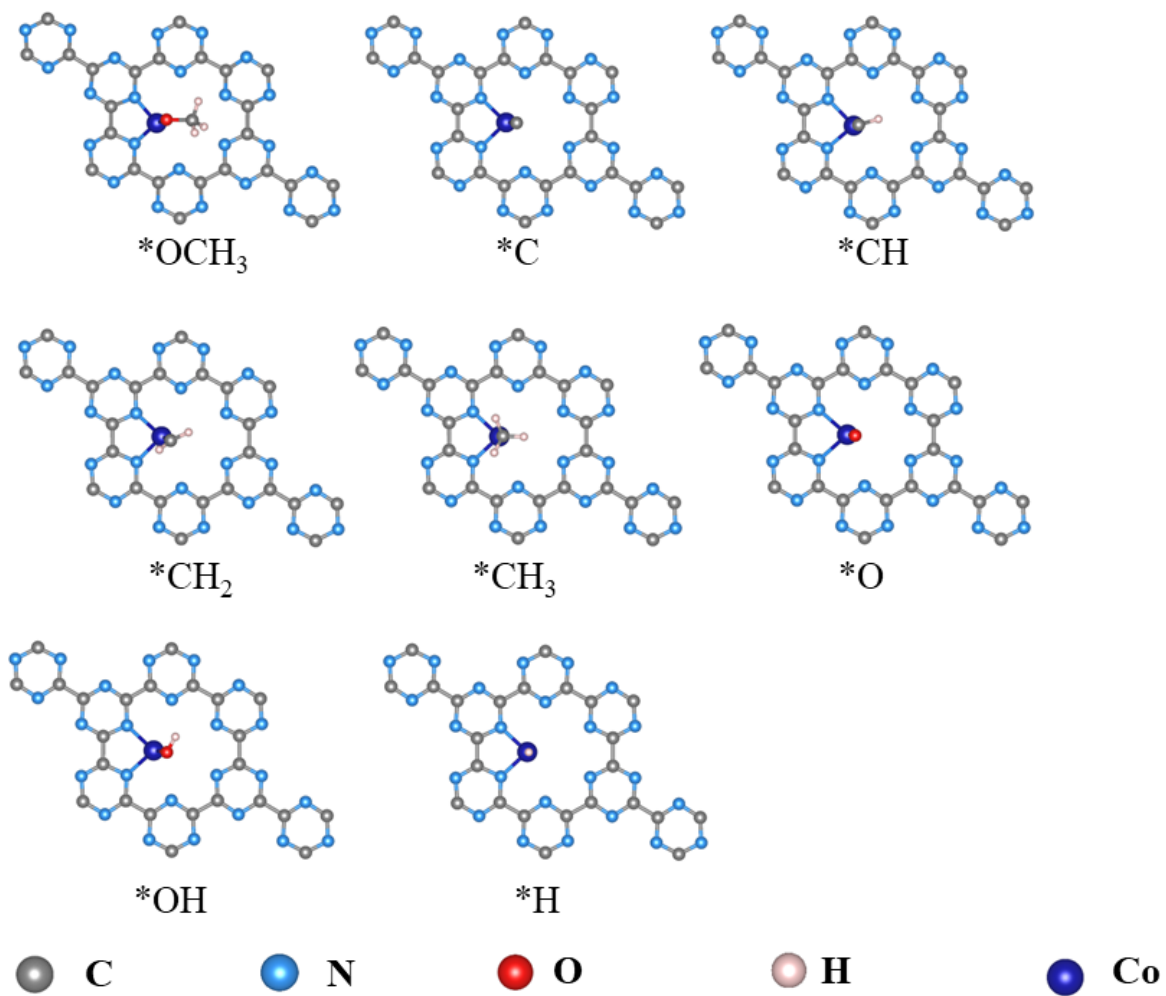

**Figure S7.** Optimized geometries for the intermediates along CO<sub>2</sub>RR pathway on Co@C<sub>6</sub>N<sub>6</sub>



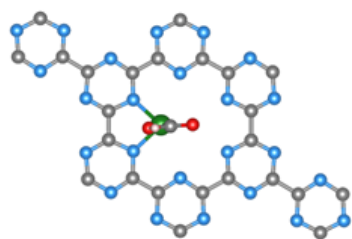

\*COOH

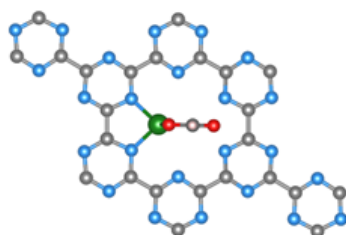

\*OCHO

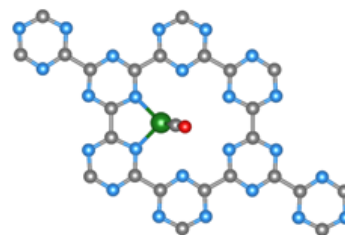

\*CO

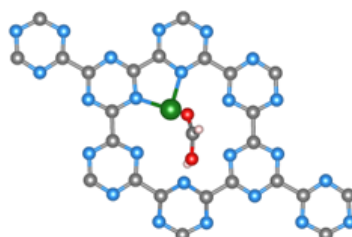

\*HCOOH

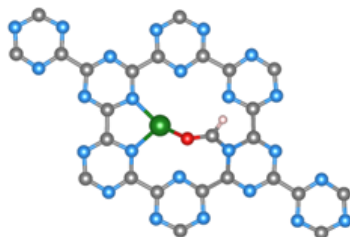

\*CHO

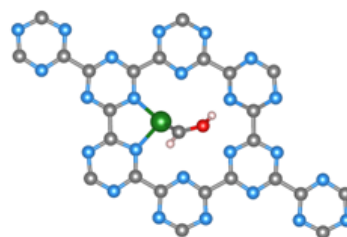

\*CHOH

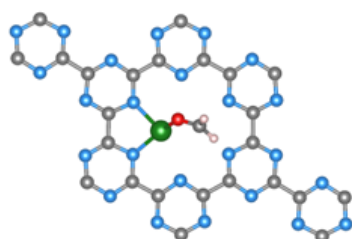

\*OCH<sub>2</sub>

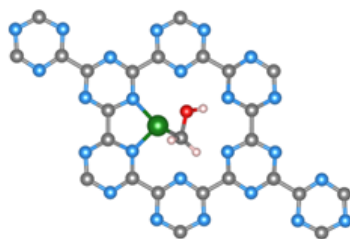

\*CH<sub>2</sub>OH

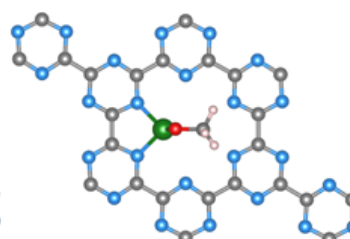

\*OCH<sub>3</sub>

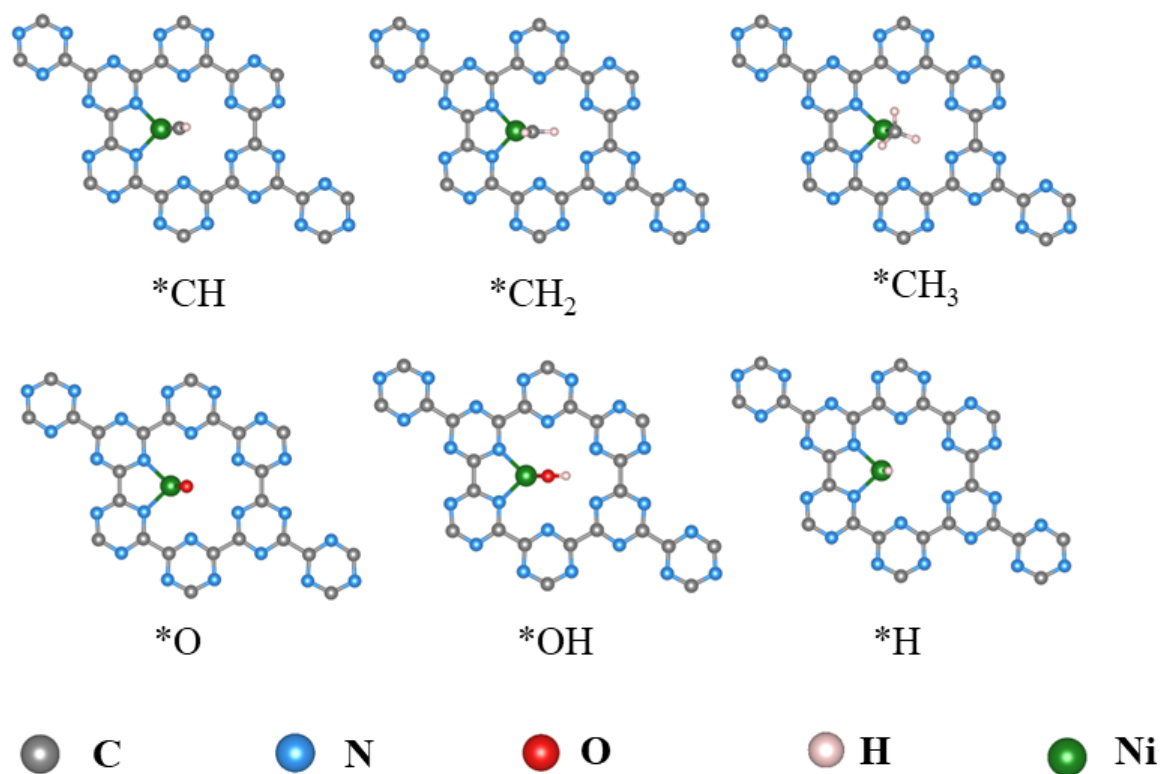

Figure S8. Optimized geometries for the intermediates along CO<sub>2</sub>RR pathway on Ni@C<sub>6</sub>N<sub>6</sub>

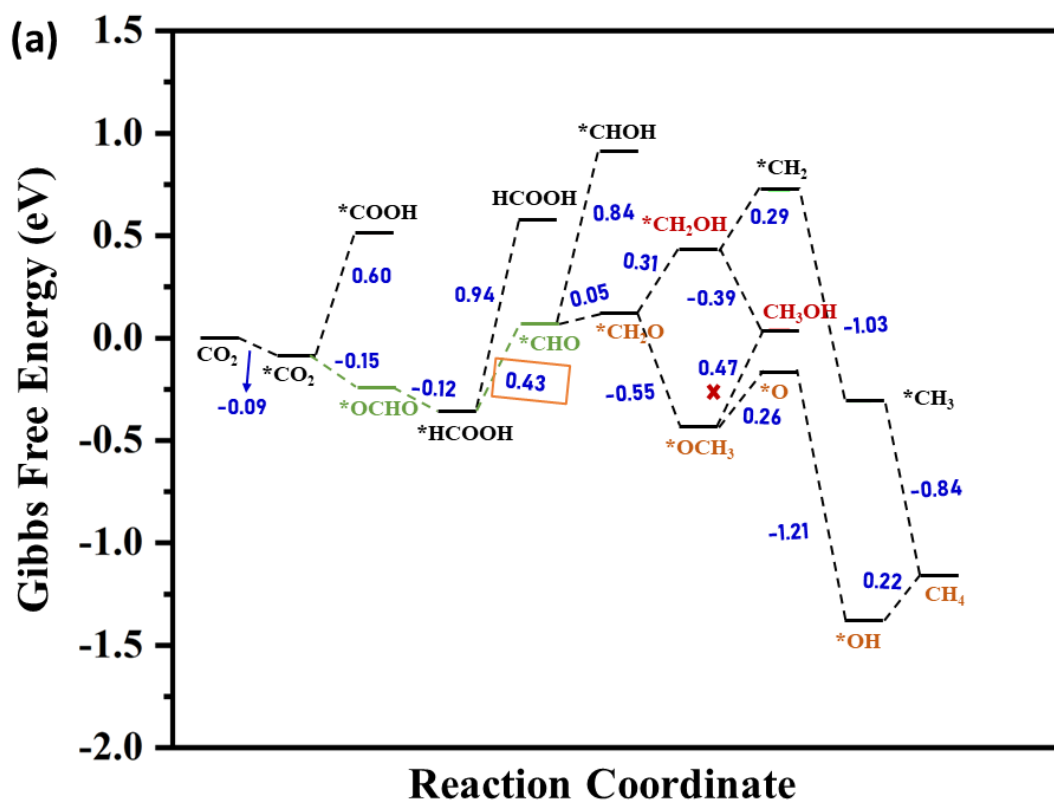

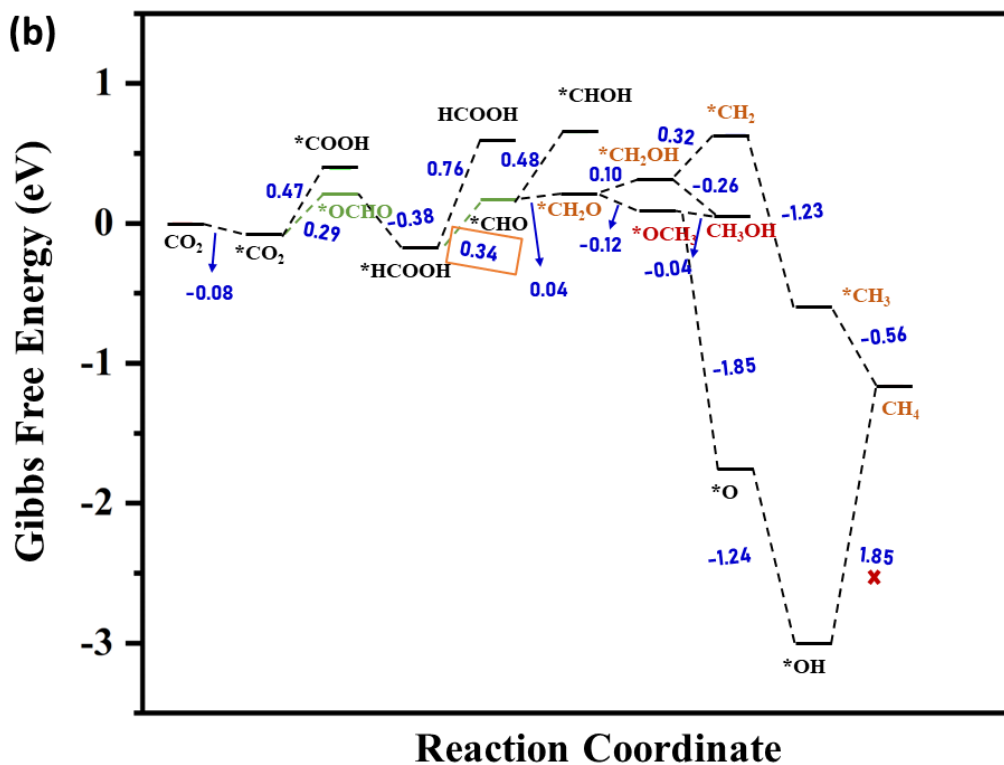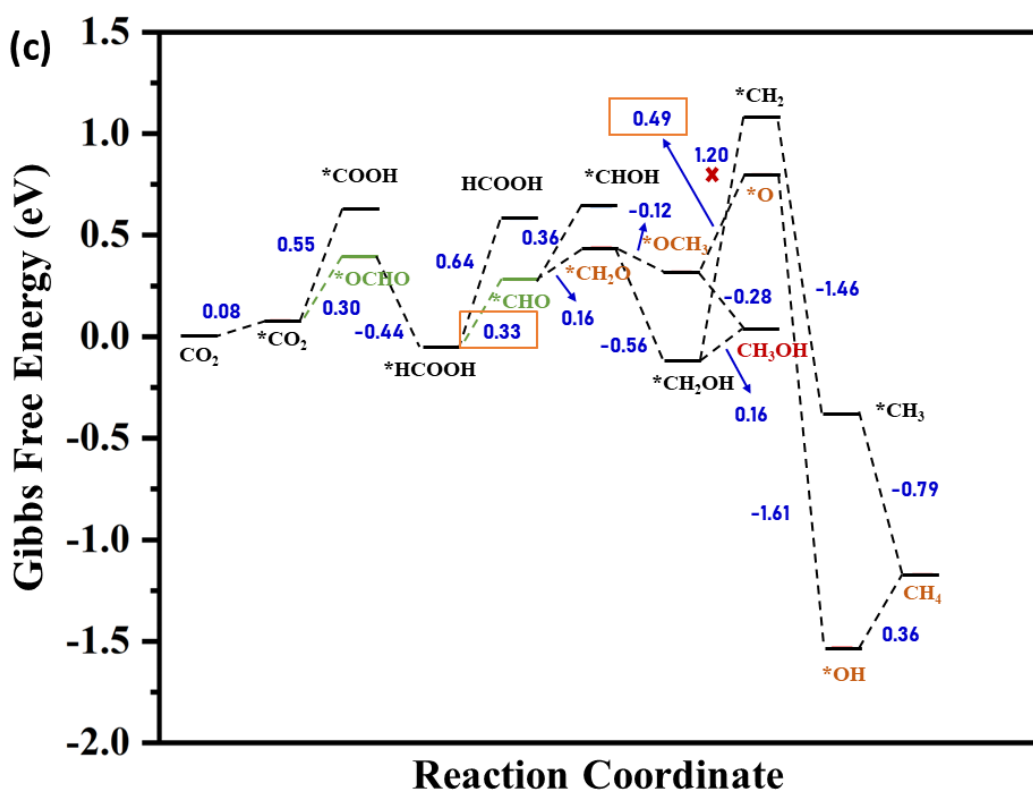

Figure S9. The complete Gibbs Free energy profile for CO<sub>2</sub>RR on (a) Fe@C<sub>6</sub>N<sub>6</sub>, (b) Co@C<sub>6</sub>N<sub>6</sub> and (c) Ni@C<sub>6</sub>N<sub>6</sub> nanosheet.

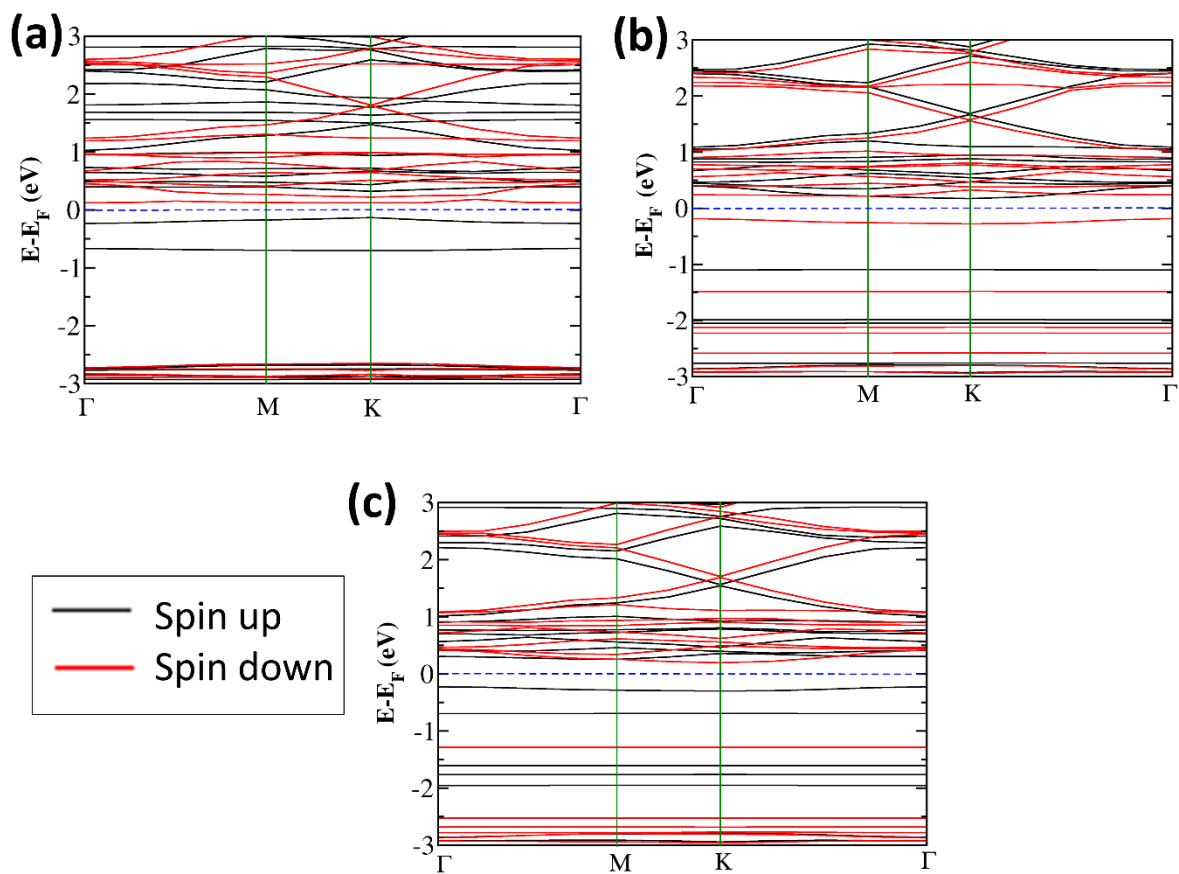

**Figure S10.** The spin-polarised band structures of the (a) Fe@C<sub>6</sub>N<sub>6</sub>, (b) Co@C<sub>6</sub>N<sub>6</sub> and, (c) Ni@C<sub>6</sub>N<sub>6</sub> sheet from the HSE06 functional.

|                    | ZPE  | TS   |
|--------------------|------|------|
| CO <sub>2</sub>    | 0.31 | 0.66 |
| CO                 | 0.14 | 0.61 |
| H <sub>2</sub>     | 0.28 | 0.40 |
| H <sub>2</sub> O   | 0.57 | 0.58 |
| HCOOH              | 0.89 | 0.77 |
| CH <sub>3</sub> OH | 1.36 | 0.74 |
| CH <sub>4</sub>    | 1.19 | 0.58 |

**Table S1.** The ZPE and TS values (in eV) for gaseous molecules at 298 K.

| Adsorbates          | Fe@C <sub>6</sub> N <sub>6</sub> |      | Co@C <sub>6</sub> N <sub>6</sub> |      | Ni@C <sub>6</sub> N <sub>6</sub> |      |
|---------------------|----------------------------------|------|----------------------------------|------|----------------------------------|------|
|                     | ZPE                              | TS   | ZPE                              | TS   | ZPE                              | TS   |
| *CO <sub>2</sub>    | 0.32                             | 0.29 | 0.31                             | 0.25 | 0.32                             | 0.31 |
| *COOH               | 0.60                             | 0.27 | 0.61                             | 0.27 | 0.60                             | 0.30 |
| *OCHO               | 0.59                             | 0.27 | 0.61                             | 0.23 | 0.59                             | 0.30 |
| *CO                 | 0.20                             | 0.17 | 0.20                             | 0.16 | 0.20                             | 0.17 |
| *HCOOH              | 0.89                             | 0.23 | 0.90                             | 0.23 | 0.90                             | 0.23 |
| *CHO                | 0.55                             | 0.08 | 0.46                             | 0.21 | 0.55                             | 0.09 |
| *COH                | 0.46                             | 0.22 | 0.47                             | 0.20 | -                                | -    |
| *CHOH               | 0.78                             | 0.19 | 0.78                             | 0.21 | 0.78                             | 0.14 |
| *CH <sub>2</sub> O  | 0.76                             | 0.21 | 0.76                             | 0.21 | 0.76                             | 0.21 |
| *CH <sub>3</sub> O  | 1.07                             | 0.23 | 1.08                             | 0.22 | 1.07                             | 0.23 |
| *CH <sub>2</sub> OH | 1.08                             | 0.22 | 1.08                             | 0.24 | 1.08                             | 0.11 |
| *CH                 | 0.33                             | 0.09 | 0.26                             | 0.10 | 0.32                             | 0.12 |
| *CH <sub>2</sub>    | 0.60                             | 0.12 | 0.61                             | 0.11 | 0.73                             | 0.04 |
| *CH <sub>3</sub>    | 0.93                             | 0.14 | 0.93                             | 0.15 | 0.92                             | 0.19 |
| *O                  | 0.06                             | 0.06 | 0.06                             | 0.07 | 0.05                             | 0.09 |
| *OH                 | 0.34                             | 0.11 | 0.33                             | 0.15 | 0.34                             | 0.14 |
| *CH <sub>3</sub> OH | 1.40                             | 0.30 | 1.36                             | 0.31 | 1.37                             | 0.24 |
| *CH <sub>4</sub>    | 1.20                             | 0.29 | 1.21                             | 0.25 | 1.21                             | 0.27 |

**Table S2.** The ZPE and TS values (in eV) for the adsorbates on TM@C<sub>6</sub>N<sub>6</sub> systems (TM = Fe, Co, Ni).

| Elementary steps                                                                             | $\Delta G$ (eV)                  |                                  |                                  |
|----------------------------------------------------------------------------------------------|----------------------------------|----------------------------------|----------------------------------|
|                                                                                              | Fe@C <sub>6</sub> N <sub>6</sub> | Co@C <sub>6</sub> N <sub>6</sub> | Ni@C <sub>6</sub> N <sub>6</sub> |
| 1. $\text{CO}_2 + * \rightarrow * \text{CO}_2$                                               | -0.09                            | -0.08                            | 0.08                             |
| 2. $* \text{CO}_2 + \text{H}^+ + \text{e}^- \rightarrow * \text{COOH}$                       | 0.60                             | 0.47                             | 0.55                             |
| 3. $* \text{CO}_2 + \text{H}^+ + \text{e}^- \rightarrow * \text{OCHO}$                       | -0.15                            | 0.29                             | 0.30                             |
| 4. $* \text{COOH} + \text{H}^+ + \text{e}^- \rightarrow * \text{CO} + \text{H}_2\text{O}$    | -0.70                            | -1.10                            | -1.00                            |
| 5. $* \text{CO} \rightarrow \text{CO} + *$                                                   | 0.83                             | 1.35                             | 1.01                             |
| 6. $* \text{COOH} + \text{H}^+ + \text{e}^- \rightarrow * \text{HCOOH}$                      | -0.86                            | -0.56                            | -0.68                            |
| 7. $* \text{OCHO} + \text{H}^+ + \text{e}^- \rightarrow * \text{HCOOH}$                      | -0.12                            | -0.38                            | -0.44                            |
| 8. $* \text{HCOOH} \rightarrow \text{HCOOH} + *$                                             | 0.94                             | 0.76                             | 0.64                             |
| 9. $* \text{CO} + \text{H}^+ + \text{e}^- \rightarrow * \text{CHO}$                          | 0.26                             | 0.88                             | 0.65                             |
| 10. $* \text{CO} + \text{H}^+ + \text{e}^- \rightarrow * \text{COH}$                         | 1.54                             | 1.99                             | -                                |
| 12. $* \text{HCOOH} + \text{H}^+ + \text{e}^- \rightarrow * \text{CHO} + \text{H}_2\text{O}$ | 0.43                             | 0.34                             | 0.33                             |
| 12. $* \text{CHO} + \text{H}^+ + \text{e}^- \rightarrow * \text{CHOH}$                       | 0.84                             | 0.48                             | 0.36                             |
| 13. $* \text{CHO} + \text{H}^+ + \text{e}^- \rightarrow * \text{CH}_2\text{O}$               | 0.05                             | 0.04                             | 0.16                             |
| 14. $* \text{COH} + \text{H}^+ + \text{e}^- \rightarrow * \text{C} + \text{H}_2\text{O}$     | 0.88                             | 1.26                             | -                                |
| 15. $* \text{C} + \text{H}^+ + \text{e}^- \rightarrow * \text{CH}$                           | -0.61                            | -0.09                            | -1.18                            |
| 16. $* \text{CHOH} + \text{H}^+ + \text{e}^- \rightarrow * \text{CH}_2\text{OH}$             | -0.48                            | -0.34                            | -0.76                            |
| 17. $* \text{CHOH} + \text{H}^+ + \text{e}^- \rightarrow * \text{CH} + \text{H}_2\text{O}$   | 0.71                             | 1.80                             | 1.64                             |
| 18. $* \text{CH}_2\text{O} + \text{H}^+ + \text{e}^- \rightarrow * \text{CH}_2\text{OH}$     | 0.31                             | 0.10                             | -0.56                            |
| 19. $* \text{CH}_2\text{O} + \text{H}^+ + \text{e}^- \rightarrow * \text{OCH}_3$             | -0.55                            | -0.12                            | -0.12                            |
| 20. $* \text{CH}_2\text{OH} + \text{H}^+ + \text{e}^- \rightarrow \text{CH}_3\text{OH} + *$  | -0.39                            | -0.26                            | 0.16                             |

|     |                                                                                                  |       |       |       |
|-----|--------------------------------------------------------------------------------------------------|-------|-------|-------|
| 21. | $*\text{OCH}_3 + \text{H}^+ + \text{e}^- \rightarrow \text{CH}_3\text{OH} + *$                   | 0.47  | -0.04 | -0.28 |
| 22. | $*\text{OCH}_3 + \text{H}^+ + \text{e}^- \rightarrow * \text{O} + \text{CH}_4$                   | 0.26  | -1.85 | 0.49  |
| 23. | $*\text{CH} + \text{H}^+ + \text{e}^- \rightarrow * \text{CH}_2$                                 | -0.90 | -1.82 | -1.19 |
| 24. | $*\text{CH}_2\text{OH} + \text{H}^+ + \text{e}^- \rightarrow * \text{CH}_2 + \text{H}_2\text{O}$ | 0.29  | 0.32  | 1.20  |
| 25. | $*\text{CH}_2 + \text{H}^+ + \text{e}^- \rightarrow * \text{CH}_3$                               | -1.03 | -1.23 | -1.46 |
| 26. | $*\text{CH}_3 + \text{H}^+ + \text{e}^- \rightarrow \text{CH}_4 + *$                             | -0.84 | -0.56 | -0.79 |
| 27. | $*\text{O} + \text{H}^+ + \text{e}^- \rightarrow * \text{OH}$                                    | -1.21 | -1.24 | -1.61 |
| 28. | $*\text{OH} + \text{H}^+ + \text{e}^- \rightarrow \text{H}_2\text{O} + *$                        | 0.22  | 1.85  | -0.36 |

**Table S3.** The Free energy changes (in eV) for the proposed elementary steps for CO<sub>2</sub>RR pathways on TM@C<sub>6</sub>N<sub>6</sub> systems (TM = Fe, Co, Ni).

|                    |       | Fe@C <sub>6</sub> N <sub>6</sub> | Co@C <sub>6</sub> N <sub>6</sub> | Ni@C <sub>6</sub> N <sub>6</sub> |
|--------------------|-------|----------------------------------|----------------------------------|----------------------------------|
| HER                |       | 0.40                             | 0.38                             | 0.61                             |
| CO <sub>2</sub> RR | *COOH | 0.60                             | 0.47                             | 0.55                             |
|                    | *OCHO | -0.15                            | 0.29                             | 0.30                             |

**Table S4.** Free energy change (in eV) of HER and CO<sub>2</sub>RR on TM@C<sub>6</sub>N<sub>6</sub> systems (TM = Fe, Co, Ni).

| Products           |                      | Fe@C <sub>6</sub> N <sub>6</sub>             | Co@C <sub>6</sub> N <sub>6</sub> | Ni@C <sub>6</sub> N <sub>6</sub>           |
|--------------------|----------------------|----------------------------------------------|----------------------------------|--------------------------------------------|
| CO                 | PDS                  | $*CO \rightarrow CO + *$                     |                                  |                                            |
|                    | $\Delta G_{max}(eV)$ | 0.83                                         | 1.35                             | 1.01                                       |
| HCOOH              | PDS                  | $*HCOOH \rightarrow HCOOH + *$               |                                  |                                            |
|                    | $\Delta G_{max}(eV)$ | 0.94                                         | 0.76                             | 0.64                                       |
| CH <sub>3</sub> OH | PDS                  | $*HCOOH + H^+ + e^- \rightarrow *CHO + H_2O$ |                                  |                                            |
|                    | $\Delta G_{max}(eV)$ | 0.43                                         | 0.34                             | 0.33                                       |
| CH <sub>4</sub>    | PDS                  | $*HCOOH + H^+ + e^- \rightarrow *CHO + H_2O$ |                                  | $*OCH_3 + H^+ + e^- \rightarrow *O + CH_4$ |
|                    | $\Delta G_{max}(eV)$ | 0.43                                         | 0.34                             | 0.49                                       |

**Table S5.** The maximum Gibbs Free energy values (in eV) of the potential determining steps for various C<sub>1</sub> products on TM@C<sub>6</sub>N<sub>6</sub> systems (TM = Fe, Co, Ni).
